# Supplementary material
Source: Springer Nature journal article supplement (https://www.springermedizin.de/resource/supplementary/13256_2014_2894_MOESM1_ESM.pdf/9650768)

**a**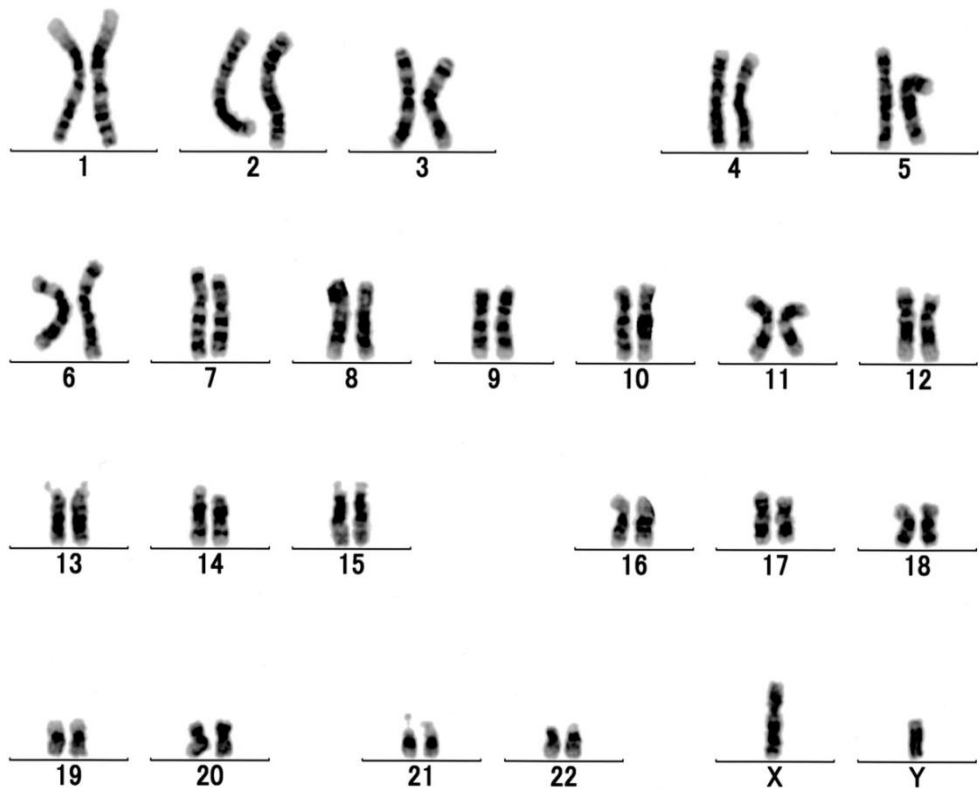**b**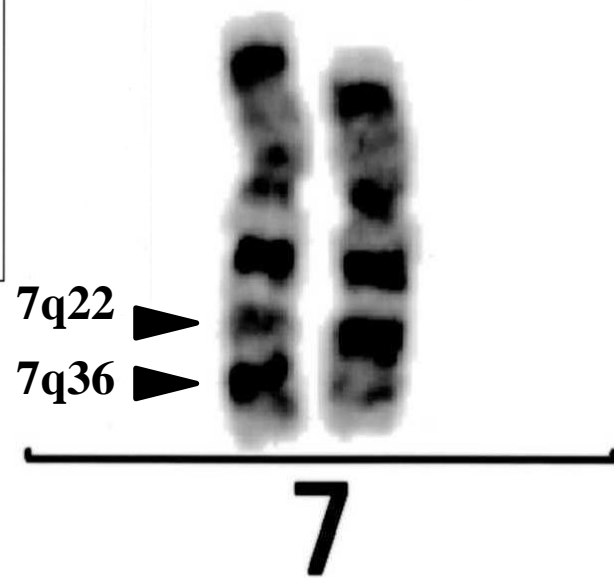

Supplement: MOESM1 [file 9650768]
